# Supplementary material for: Nanofibrous asymmetric collagen/curcumin membrane containing aspirin-loaded PLGA nanoparticles for guided bone regeneration
Source: PubMed Central journal article supplement (PMC7584591; doi:10.1038/s41598-020-75454-2), 2020-10-23
Supplement: 41598_2020_75454_MOESM1_ESM.pdf [file 41598_2020_75454_MOESM1_ESM.pdf]

## SUPPLEMENTARY MATERIAL

### **Nanofibrous asymmetric collagen/curcumin membrane containing aspirin-loaded PLGA nanoparticles for guided bone regeneration**

**Mohammad Ali Ghavimi <sup>a,#</sup>, Amirhossein Bani Shahabadi <sup>a,#</sup>, Seyedhosein Jarolmasjed <sup>b</sup>,  
Mohammad Yousef Memar <sup>c</sup>, Solmaz Maleki Dizaj <sup>d,\*</sup>, Simin Sharifi <sup>d,e,\*</sup>**

<sup>a</sup> *Department of Oral and Maxillofacial Surgery, Faculty of Dentistry, Tabriz University of Medical Sciences, Tabriz, Iran*

<sup>b</sup> *Department of Clinical Sciences, Faculty of Veterinary Medicine, University of Tabriz, Tabriz, Iran*

<sup>c</sup> *Infectious and Tropical Diseases Research Center, Tabriz University of Medical Sciences, Tabriz, Iran*

<sup>d</sup> *Dental and Periodontal Research Center, Tabriz University of Medical Sciences, Tabriz, Iran*

<sup>e</sup> *Stem Cell Research Center, Tabriz University of Medical Sciences, Tabriz, Iran*

# *Co-First/Equal authorship*

\*maleki.s.89@gmail.com

P\* sharifi.ghazi@gmail.com

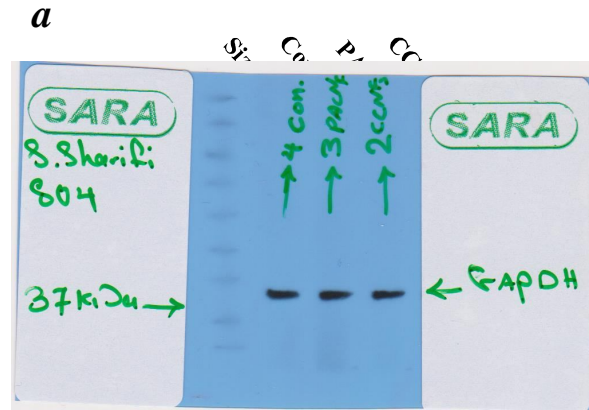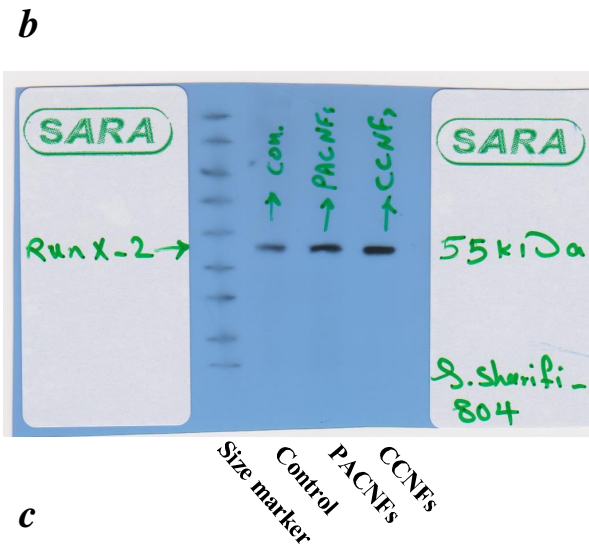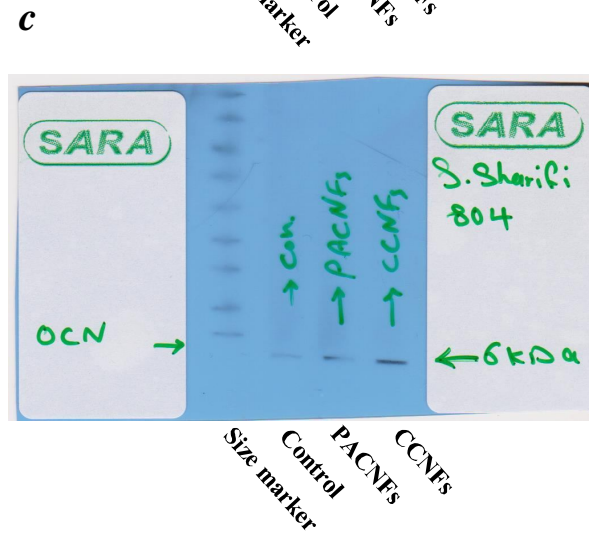

**Figure 1.** Osteogenic differentiation of DPSCs cultured on PACNs and CCNFs membranes at 21 day in the osteogenic medium. The cell lysates were prepared and used for western blot with GAPDH, Runx-2 and OCN antibodies. The figure shows (a) GAPDH (37 kDa), (b) Runx-2 (55 kDa) (c) OCN (6 kDa). The gels were not cropped.
